# Supplementary material
Source: Research Square preprint supplement (doi:10.21203/rs.3.rs-9406334/v1)
Supplement: Supplementary file 1 [file 6079cf862c97255982445aa6.pdf]

**Supplementary Table 1:** Categorization of immune compromising conditions and medications in the Stop the Spread Ottawa (SSO) cohort, according to the strength of previously reported immunosuppressive effects. In the case of a participant reporting multiple IC states, the classification was determined by the highest-level condition.

| <b>High-Level Immune Compromising States</b>                             |                                                                                                                                                                                               |                                            |
|--------------------------------------------------------------------------|-----------------------------------------------------------------------------------------------------------------------------------------------------------------------------------------------|--------------------------------------------|
| Systemic immunosuppressant medication (e.g., corticosteroids, biologics) | Abemaciclib <sup>1</sup>                                                                                                                                                                      | Mycophenolate mofetil <sup>15</sup>        |
|                                                                          | Adalimumab <sup>2</sup>                                                                                                                                                                       | Ocrelizumab <sup>16</sup>                  |
|                                                                          | Azathioprine <sup>3</sup>                                                                                                                                                                     | Prednisone <sup>17</sup>                   |
|                                                                          | Budesonide <sup>4</sup>                                                                                                                                                                       | Risankizumab <sup>18</sup>                 |
|                                                                          | Cladribine <sup>5</sup>                                                                                                                                                                       | Rituximab <sup>19</sup>                    |
|                                                                          | Cyclosporine <sup>6</sup>                                                                                                                                                                     | Secukinumab <sup>20</sup>                  |
|                                                                          | Dupilumab <sup>7</sup>                                                                                                                                                                        | Sirolimus <sup>21</sup>                    |
|                                                                          | Etanercept <sup>8</sup>                                                                                                                                                                       | Sulfasalazine <sup>22</sup>                |
|                                                                          | Glatiramer acetate <sup>9</sup>                                                                                                                                                               | Tacrolimus <sup>23</sup>                   |
|                                                                          | Guselkumab <sup>10</sup>                                                                                                                                                                      | Teriflunomide <sup>24</sup>                |
|                                                                          | Infliximab <sup>11</sup>                                                                                                                                                                      | Tocilizumab <sup>25</sup>                  |
|                                                                          | Intravenous immunoglobulin <sup>12</sup>                                                                                                                                                      | Tofacitinib <sup>26</sup>                  |
|                                                                          | Leflunomide <sup>13</sup>                                                                                                                                                                     | Upadacitinib <sup>27</sup>                 |
|                                                                          | Methotrexate <sup>14</sup>                                                                                                                                                                    | Ustekinumab <sup>28</sup>                  |
| Conditions                                                               | Malignancy (current or past) <sup>29,30</sup>                                                                                                                                                 |                                            |
|                                                                          | Primary immunodeficiency (antibody deficiency, hypogammaglobulinemia) <sup>31</sup>                                                                                                           |                                            |
|                                                                          | Organ/bone marrow transplant <sup>32</sup>                                                                                                                                                    |                                            |
|                                                                          | HIV (not suppressed: detectable viral load $\geq 20$ IU/mL) <sup>33</sup>                                                                                                                     |                                            |
|                                                                          | Rheumatological condition (rheumatoid arthritis, active systemic lupus erythematosus, polymyalgia rheumatica, polymyositis, ankylosing spondylitis, scleroderma/CREST syndrome) <sup>34</sup> |                                            |
|                                                                          | Neuromuscular autoimmune diseases (multiple sclerosis, Myasthenia gravis) <sup>35</sup>                                                                                                       |                                            |
|                                                                          | Severe liver cirrhosis <sup>36</sup>                                                                                                                                                          |                                            |
| <b>Low-Level Immune Compromising States</b>                              |                                                                                                                                                                                               |                                            |
| Asthma/COPD treated with (non-systemic) medication                       | Inhaled medications: <sup>37</sup>                                                                                                                                                            |                                            |
|                                                                          | Albuterol                                                                                                                                                                                     | Fluticasone and salmeterol                 |
|                                                                          | Budesonide                                                                                                                                                                                    | Fluticasone and vilanterol                 |
|                                                                          | Budesonide and formoterol                                                                                                                                                                     | Mometasone furoate and formoterol fumarate |
|                                                                          | Ciclesonide                                                                                                                                                                                   | dihydrate                                  |
|                                                                          | Fluticasone                                                                                                                                                                                   | Omalizumab                                 |
|                                                                          | Nasal sprays containing corticosteroids: <sup>37</sup>                                                                                                                                        |                                            |
|                                                                          | Apo-mometasone                                                                                                                                                                                | Fluticasone furoate                        |

|                       |                                                                                                                                                                                                                                                                                     |                                      |
|-----------------------|-------------------------------------------------------------------------------------------------------------------------------------------------------------------------------------------------------------------------------------------------------------------------------------|--------------------------------------|
|                       | Azelastine and fluticasone<br>Budesonide<br>Ciclesonide                                                                                                                                                                                                                             | Fluticasone propionate<br>Mometasone |
| Autoimmune conditions | Celiac disease <sup>38</sup><br>Autoimmune hepatitis <sup>39</sup><br>Graves' disease <sup>40</sup>                                                                                                                                                                                 |                                      |
| Other conditions      | Diabetes <sup>41</sup><br>Mild liver cirrhosis (fibrosis) <sup>36</sup><br>Chronic kidney disease <sup>42</sup><br>SLE in remission <sup>43</sup><br>HIV (suppressed: viral load <20 IU/mL) <sup>33</sup><br>Inflammatory bowel disease (not treated with medication) <sup>44</sup> |                                      |

## References

1. BC Cancer Drug Manual. *Abemaciclib Product Monograph*. [http://www.bccancer.bc.ca/drug-database-site/Drug-Index/Abemaciclib\\_monograph.pdf](http://www.bccancer.bc.ca/drug-database-site/Drug-Index/Abemaciclib_monograph.pdf) (2024).
2. AbbVie Corporation. *Humira (adalimumab injection) Product Monograph*. [https://pdf.hres.ca/dpd\\_pm/00067414.PDF](https://pdf.hres.ca/dpd_pm/00067414.PDF) (2022).
3. Sanis Health Inc. *Product Monograph: Azathioprine Tablets USP 50 mg*. [https://www.e-lactancia.org/media/papers/Azathioprine-DS-Sanis\\_HI2015.pdf](https://www.e-lactancia.org/media/papers/Azathioprine-DS-Sanis_HI2015.pdf) (2015).
4. Kalola, U. K. & Shashikanth, A. Budesonide. in *StatPearls [Internet]*. (StatPearls Publishing, 2023).
5. Cancer Care Ontario Drug Formulary Team. *Cladribine Drug Monograph*. <https://www.cancercareontario.ca/en/drugformulary/drugs/monograph/44196> (2024).
6. Tapia, C., Nessel, T. A. & Zito, P. M. Cyclosporine. in *StatPearls [Internet]*. (StatPearls Publishing, 2023).
7. Sanofi USA. *Dupixent: Prescribing Information*. [https://www.regeneron.com/sites/default/files/Dupixent\\_FPI.pdf](https://www.regeneron.com/sites/default/files/Dupixent_FPI.pdf) (2025).
8. Pan, A. & Gerriets, V. Etanercept. in *StatPearls [Internet]*. (StatPearls Publishing, 2023).
9. Teva Neuroscience Inc. *COPAXONE (glatiramer acetate injection): Full Prescribing Information*. <https://www.copaxone.com/globalassets/copaxone/prescribing-information.pdf> (2025).
10. Janssen Inc. *TREMFYA Product Monograph*. [https://pdf.hres.ca/dpd\\_pm/00049030.PDF](https://pdf.hres.ca/dpd_pm/00049030.PDF) (2018).
11. Fatima, R., Bittar, K. & Aziz, M. Infliximab. in *StatPearls [Internet]*. (StatPearls Publishing, 2024).
12. Arumugham, V. B. & Rayi., A. Intravenous Immunoglobulin (IVIG). in *StatPearls [Internet]* (Treasure Island (FL): StatPearls Publishing, 2023).
13. Apotex Inc. *Apo-Leflunomide Product Monograph*. [https://pdf.hres.ca/dpd\\_pm/00033823.PDF](https://pdf.hres.ca/dpd_pm/00033823.PDF) (2016).
14. Hanoodi, M. & Mittal, M. Methotrexate. in *StatPearls [Internet]*. (StatPearls Publishing, 2024).
15. Roche Canada. *Product Monograph: CellCept mycophenolate mofetil*. [https://assets.roche.com/f/173850/x/54df9ba719/cellcept\\_pm\\_e.pdf](https://assets.roche.com/f/173850/x/54df9ba719/cellcept_pm_e.pdf) (2023).
16. Flynn, J. P. & Gerriets, V. Ocrelizumab. in *StatPearls [Internet]*. (StatPearls Publishing, 2023).
17. Puckett, Y., Patel, P. & Bokhari, A. A. Prednisone. in *StatPearls [Internet]*. (StatPearls Publishing, 2025).
18. AbbVie Corporation. *SKYRIZI Prescribing Information*. [https://www.rxabbvie.com/pdf/skyrizi\\_pi.pdf](https://www.rxabbvie.com/pdf/skyrizi_pi.pdf) (2024).
19. Hanif, N. & Anwer, F. Rituximab. in *StatPearls [Internet]*. (StatPearls Publishing, 2024).
20. Aboobacker, S., Kurn, H. & Aboud, A. M. Al. Secukinumab. in *StatPearls [Internet]*. (StatPearls Publishing, 2023).
21. Sehgal, S. N. Rapamune (RAPA, rapamycin, sirolimus): mechanism of action immunosuppressive effect results from blockade of signal transduction and inhibition of cell cycle progression. *Clin. Biochem.* **31**, 335–340 (1998).
22. Choi, J., Patel, P. & Fenando, A. Sulfasalazine. in *StatPearls [Internet]*. (StatPearls Publishing, 2024).

23. Araya, A. A. & Tasnif, Y. Tacrolimus. in *StatPearls [Internet]*. (StatPearls Publishing, 2023).
24. Sanofi USA. *AUBAGIO Medication Guide*. <https://products.sanofi.us/aubagio/aubagio.pdf> (2024).
25. Genentech Inc. *ACTEMRA Medication Guide and Instructions for Use*. (2024).
26. Pfizer Canada. *XELJANZ Product Monograph*. <https://webfiles.pfizer.com/file/177102d8-752d-40dc-ab60-4597fe78565f?referrer=ccb731e5-4f2d-4f4a-b2dc-e5e912145fc6> (2024).
27. AbbVie Corporation. *RINVOQ Product Monograph*. [https://www.abbvie.ca/content/dam/abbvie-dotcom/ca/en/documents/products/RINVOQ\\_PM\\_EN.pdf](https://www.abbvie.ca/content/dam/abbvie-dotcom/ca/en/documents/products/RINVOQ_PM_EN.pdf) (2025).
28. Colquhoun, M. & Kemp, A. K. Ustekinumab. in *StatPearls [Internet]* (StatPearls Publishing, 2023).
29. Sun, H. *et al.* COVID-19 vaccine response and safety in patients with cancer: An overview of systematic reviews. *Front. public Heal.* **10**, 1072137 (2022).
30. Carreira, H. *et al.* Prevalence of COVID-19-related risk factors and risk of severe influenza outcomes in cancer survivors: A matched cohort study using linked English electronic health records data. *eClinicalMedicine* **29**, (2020).
31. Evers, G., Thrull, M., Wittkowski, H., Schmidt, L. H. & Mohr, M. [Primary Immunodeficiency: Primary Antibody Disorders in Respiratory Medicine]. *Pneumologie* **73**, 94–107 (2019).
32. Boyarsky, B. J. *et al.* Antibody Response to 2-Dose SARS-CoV-2 mRNA Vaccine Series in Solid Organ Transplant Recipients. *JAMA* **325**, 2204–2206 (2021).
33. Sheth, A. N., Althoff, K. N. & Brooks, J. T. Influenza susceptibility, severity, and shedding in HIV-infected adults: a review of the literature. *Clin. Infect. Dis. an Off. Publ. Infect. Dis. Soc. Am.* **52**, 219–227 (2011).
34. Pri-Paz Basson, Y. *et al.* Immunogenicity and safety of the mRNA-based BNT162b2 vaccine in systemic autoimmune rheumatic diseases patients. *Clin. Rheumatol.* **41**, 3879–3885 (2022).
35. Iaffaldano, P. *et al.* Risk of Getting COVID-19 in People With Multiple Sclerosis: A Case-Control Study. *Neurol. Neuroimmunol. neuroinflammation* **9**, (2022).
36. Albillos, A. *et al.* Cirrhosis-associated immune dysfunction. *Nat. Rev. Gastroenterol. Hepatol.* **19**, 112–134 (2022).
37. Pandya, D., Puttanna, A. & Balagopal, V. Systemic effects of inhaled corticosteroids: an overview. *Open Respir. Med. J.* **8**, 59–65 (2014).
38. Albatayneh, E., Alabdallat, Y., Kreishan, E., Ayash, H. & Abu-Lubad, M. Humoral immune response to COVID-19 infection or vaccination among celiac disease patients. *Cent. J. Immunol.* **47**, 267–274 (2022).
39. Li, H. *et al.* Association between immunosuppressants and poor antibody responses to SARS-CoV-2 vaccines in patients with autoimmune liver diseases. *Front. Immunol.* **13**, 988004 (2022).
40. Struja, T. *et al.* Is Graves' disease a primary immunodeficiency? New immunological perspectives on an endocrine disease. *BMC Med.* **15**, 174 (2017).
41. Boroumand, A. B. *et al.* Immunogenicity of COVID-19 vaccines in patients with diabetes mellitus: A systematic review. *Front. Immunol.* **13**, 940357 (2022).
42. Syed-Ahmed, M. & Narayanan, M. Immune Dysfunction and Risk of Infection in Chronic Kidney Disease. *Adv. Chronic Kidney Dis.* **26**, 8–15 (2019).
43. Izmirly, P. M. *et al.* Evaluation of Immune Response and Disease Status in Systemic Lupus Erythematosus Patients Following SARS-CoV-2 Vaccination. *Arthritis Rheumatol. (Hoboken, N.J.)* **74**, 284–294 (2022).
44. Kreuzberger, N. *et al.* Immunity after COVID-19 vaccination in people with higher risk of compromised immune status: a scoping review. *Cochrane database Syst. Rev.* **8**, CD015021 (2022).

**Supplementary Table 2:** Median log-adjusted IgG (log<sub>10</sub> BAU/mL), IgA and IgM (log<sub>10</sub> µg/mL) titres against the SARS-CoV-2 spike (S) and receptor-binding domain (RBD) proteins at time points prior to and following COVID-19 vaccine doses for participants with no prior SARS-CoV-2 infection, according to immune status at baseline (n=932 participants).<sup>†</sup>

| Antibody Titre<br>Median (IQR)<br>Range (min, max) | All Participants<br>N=932                       | IC – High level<br>N=104                       | NIC and IC – Low level<br>N=828                 | P       |
|----------------------------------------------------|-------------------------------------------------|------------------------------------------------|-------------------------------------------------|---------|
| Anti-S IgG (log <sub>10</sub> BAU/mL):             |                                                 |                                                |                                                 |         |
| 7-21 days (14) after dose 1                        | N=110<br>2.57 (1.63, 3.00)<br>4.45 (0, 4.45)    | N=10<br>1.58 (0.59, 1.90)<br>2.96 (0, 2.96)    | N=100<br>2.69 (1.74, 3.02)<br>4.45 (0, 4.45)    | 0.003*  |
| 1-2 months (1.5) after dose 1                      | N=100<br>2.78 (2.08, 3.06)<br>2.24 (1.27, 3.51) | N=11<br>1.95 (1.45, 2.84)<br>1.98 (1.27, 3.25) | N=89<br>2.82 (2.14, 3.08)<br>2.16 (1.35, 3.51)  | 0.02*   |
| 7-21 days (14) after dose 2                        | N=106<br>3.84 (3.48, 4.08)<br>4.45 (0, 4.45)    | N=9<br>2.06 (2.02, 3.55)<br>4.22 (0, 4.22)     | N=97<br>3.86 (3.60, 4.09)<br>2.66 (1.80, 4.45)  | 0.005*  |
| 1-2 months (1.5) after dose 2                      | N=208<br>3.52 (3.29, 3.70)<br>4.45 (0, 4.45)    | N=30<br>3.25 (2.03, 3.55)<br>4.43 (0, 4.43)    | N=176<br>3.54 (3.34, 3.72)<br>3.95 (0.50, 4.45) | 0.0001* |
| 2.5-4.5 months (3) after dose 2                    | N=391<br>3.36 (3.13, 3.51)<br>4.45 (0, 4.45)    | N=41<br>3.17 (2.09, 3.46)<br>4.45 (0, 4.45)    | N=350<br>3.36 (3.14, 3.51)<br>3.55 (0.90, 4.45) | 0.02*   |
| 5.5-6.5 months (6) after dose 2                    | N=162<br>3.05 (2.73, 3.21)<br>2.23 (1.51, 3.74) | N=6<br>2.87 (2.14, 3.40)<br>1.63 (1.83, 3.46)  | N=156<br>3.05 (2.77, 3.21)<br>2.23 (1.51, 3.74) | 0.83    |
| 1-2 months (1.5) after dose 3                      | N=32<br>3.76 (3.56, 3.91)<br>2.70 (1.75, 4.45)  | N=11<br>3.60 (2.14, 4.14)<br>2.64 (1.75, 4.39) | N=21<br>3.76 (3.63, 3.88)<br>1.11 (3.34, 4.45)  | 0.50    |
| 2.5-4.5 months (3) after dose 3                    | N=136<br>3.50 (3.35, 3.72)<br>3.44 (1.07, 4.50) | N=18<br>3.37 (2.72, 3.52)<br>2.34 (1.68, 4.02) | N=118<br>3.52 (3.37, 3.73)<br>3.44 (1.07, 4.50) | 0.01*   |
| 5.5-6.5 months (6) after dose 3                    | N=43<br>3.23 (3.04, 3.48)<br>4.12 (0.00, 4.12)  | N=5<br>3.05 (2.91, 3.43)<br>3.69 (0.00, 3.69)  | N=38<br>3.24 (3.10, 3.48)<br>1.45 (2.67, 4.12)  | 0.39    |
| 2.5-4.5 months (3) after dose 4                    | N=45<br>3.65 (3.37, 3.77)<br>1.38 (2.86, 4.24)  | N=14<br>3.67 (3.26, 3.91)<br>1.38 (2.86, 4.24) | N=31<br>3.63 (3.39, 3.73)<br>0.86 (3.09, 3.96)  | 0.99    |
| 5.5-6.5 months (6) after dose 4                    | N=20<br>3.33 (3.04, 3.55)<br>1.28 (2.63, 3.91)  | N=5<br>3.41 (2.92, 3.67)<br>1.28 (2.63, 3.91)  | N=15<br>3.32 (3.05, 3.52)<br>0.95 (2.87, 3.82)  | 0.83    |
| 1-2 months (1.5) after dose 5                      | N=16<br>3.58 (3.50, 3.77)<br>1.34 (3.23, 4.57)  | N=4<br>3.58 (3.43, 4.08)<br>1.27 (3.30, 4.57)  | N=12<br>3.58 (3.50, 3.77)<br>0.78 (3.23, 4.01)  | 0.81    |
| 2.5-4.5 months (3) after dose 5                    | N=26<br>3.44 (3.37, 3.73)<br>2.46 (1.46, 3.92)  | N=9<br>3.48 (3.40, 3.53)<br>0.52 (3.37, 3.88)  | N=17<br>3.42 (3.36, 3.76)<br>2.46 (1.45, 3.92)  | 0.54    |
| 5.5-6.5 months (6) after dose 5                    | N=24<br>3.30 (2.75, 3.55)<br>2.32 (1.59, 3.91)  | N=4<br>3.30 (2.91, 3.61)<br>1.49 (2.52, 3.91)  | N=20<br>3.32 (2.75, 3.55)<br>2.04 (1.59, 3.64)  | 0.88    |
| 1-2 months (1.5) after dose 6                      | N=9<br>3.73 (3.52, 3.84)<br>2.72 (1.52, 4.24)   | N=4<br>3.68 (3.52, 3.87)<br>0.37 (3.52, 3.89)  | N=5<br>3.73 (3.32, 3.83)<br>2.72 (1.52, 4.24)   | 0.62    |
| 2.5-4.5 months (3) after dose 6                    | N=11                                            | N=5                                            | N=6                                             | 0.47    |

|                                          |                                                 |                                                |                                                 |         |
|------------------------------------------|-------------------------------------------------|------------------------------------------------|-------------------------------------------------|---------|
|                                          | 3.54 (3.29, 3.66)<br>2.41 (1.67, 4.08)<br>N=8   | 3.42 (3.29, 3.54)<br>0.65 (3.23, 3.88)<br>N=4  | 3.64 (3.34, 3.66)<br>2.41 (1.67, 4.08)<br>N=4   |         |
| 5.5-6.5 months (6) after dose 6          | 3.43 (3.18, 3.59)<br>0.87 (2.92, 3.79)          | 3.42 (3.10)<br>0.70 (3.59)                     | 3.43 (3.21, 3.65)<br>0.72 (3.07, 3.79)          | 0.77    |
| Anti-RBD IgG (log <sub>10</sub> BAU/mL): |                                                 |                                                |                                                 |         |
| 7-21 days (14) after dose 1              | N=110<br>2.10 (1.46, 2.47)<br>4.19 (0, 4.19)    | N=10<br>1.52 (0.89, 1.86)<br>1.81 (0.54, 2.36) | N=100<br>2.15 (1.58, 2.51)<br>4.19 (0, 4.19)    | 0.01*   |
| 1-2 months (1.5) after dose 1            | N=100<br>2.28 (2.01, 2.55)<br>2.54 (1.12, 3.66) | N=11<br>1.77 (1.59, 2.54)<br>1.95 (1.12, 3.07) | N=89<br>2.30 (2.05, 2.55)<br>2.35 (1.31, 3.66)  | 0.04*   |
| 7-21 days (14) after dose 2              | N=106<br>3.87 (3.55, 4.05)<br>4.64 (0.45, 5.09) | N=9<br>3.45 (2.33, 3.61)<br>3.62 (0.45, 4.07)  | N=97<br>3.88 (3.62, 4.07)<br>3.16 (1.93, 5.09)  | 0.004*  |
| 1-2 months (1.5) after dose 2            | N=206<br>3.47 (2.67, 3.73)<br>3.87 (0.54, 4.41) | N=30<br>3.06 (2.53, 3.52)<br>3.46 (0.54, 4.01) | N=176<br>3.51 (3.18, 3.75)<br>3.62 (0.80, 4.41) | 0.001*  |
| 2.5-4.5 months (3) after dose 2          | N=391<br>3.32 (2.66, 3.53)<br>3.79 (0.70, 4.49) | N=41<br>2.59 (2.34, 3.48)<br>3.79 (0.70, 4.49) | N=350<br>3.33 (2.91, 3.54)<br>3.32 (0.92, 4.25) | 0.0006* |
| 5.5-6.5 months (6) after dose 2          | N=162<br>2.65 (2.38, 3.15)<br>2.10 (1.52, 3.62) | N=6<br>2.79 (2.34, 3.23)<br>1.10 (2.18, 3.28)  | N=156<br>2.65 (2.39, 3.15)<br>2.10 (1.52, 3.62) | 0.86    |
| 1-2 months (1.5) after dose 3            | N=32<br>3.84 (3.60, 4.02)<br>2.97 (1.61, 4.58)  | N=11<br>3.61 (1.80, 4.12)<br>2.69 (1.61, 4.30) | N=21<br>3.85 (3.69, 3.91)<br>1.27 (3.31, 4.58)  | 0.31    |
| 2.5-4.5 months (3) after dose 3          | N=136<br>3.51 (3.28, 3.75)<br>3.12 (1.38, 4.50) | N=18<br>3.27 (1.73, 3.50)<br>2.62 (1.38, 3.99) | N=118<br>3.56 (3.31, 3.76)<br>3.03 (1.46, 4.50) | 0.008*  |
| 5.5-6.5 months (6) after dose 3          | N=43<br>3.25 (2.95, 3.41)<br>3.20 (1.03, 4.23)  | N=5<br>2.85 (2.61, 3.34)<br>2.67 (1.03, 3.71)  | N=38<br>3.25 (2.99, 3.41)<br>2.07 (2.17, 4.23)  | 0.28    |
| 2.5-4.5 months (3) after dose 4          | N=45<br>3.70 (3.37, 3.85)<br>2.19 (2.10, 4.28)  | N=14<br>3.73 (2.97, 3.91)<br>2.19 (2.10, 4.28) | N=31<br>3.70 (3.42, 3.81)<br>1.04 (3.12, 4.15)  | 0.74    |
| 5.5-6.5 months (6) after dose 4          | N=20<br>3.43 (3.14, 3.65)<br>1.93 (2.03, 3.96)  | N=5<br>3.26 (3.17, 3.70)<br>1.68 (2.03, 3.71)  | N=15<br>3.47 (3.11, 3.63)<br>1.23 (2.73, 3.96)  | 0.76    |
| 1-2 months (1.5) after dose 5            | N=16<br>3.65 (3.55, 3.82)<br>1.21 (3.23, 4.44)  | N=4<br>3.69 (3.45, 4.11)<br>1.13 (3.31, 4.44)  | N=12<br>3.65 (3.55, 3.82)<br>0.78 (3.23, 4.01)  | 0.72    |
| 2.5-4.5 months (3) after dose 5          | N=26<br>3.60 (3.36, 3.79)<br>2.50 (1.63, 4.12)  | N=9<br>3.62 (3.51, 3.65)<br>0.84 (3.28, 3.12)  | N=17<br>3.44 (3.35, 3.79)<br>2.49 (1.63, 4.11)  | 0.54    |
| 5.5-6.5 months (6) after dose 5          | N=24<br>3.52 (2.81, 3.63)<br>2.30 (1.78, 4.08)  | N=4<br>3.53 (2.90, 3.84)<br>1.74 (2.34, 4.08)  | N=20<br>3.37 (2.81, 3.63)<br>1.98 (1.78, 3.77)  | 0.82    |
| 1-2 months (1.5) after dose 6            | N=9<br>3.85 (3.35, 3.95)<br>2.46 (1.59, 4.06)   | N=4<br>3.72 (3.47, 3.93)<br>0.67 (3.35, 4.02)  | N=5<br>3.90 (3.31, 3.95)<br>2.46 (1.59, 4.06)   | 1.00    |
| 2.5-4.5 months (3) after dose 6          | N=11<br>3.51 (3.36, 3.82)<br>1.31 (2.72, 4.04)  | N=5<br>3.48 (3.36, 3.51)<br>0.83 (3.07, 3.91)  | N=6<br>3.73 (3.36, 3.82)<br>1.32 (2.72, 4.04)   | 0.47    |
| 5.5-6.5 months (6) after dose 6          | N=8<br>3.40 (3.18, 3.59)                        | N=4<br>3.40 (2.82, 3.56)                       | N=4<br>3.42 (3.18, 3.64)                        | 0.77    |

|                                         | 1.49 (2.27, 3.76)                              | 1.40 (2.27, 3.68)                              | 0.73 (3.03, 3.76)                              |         |
|-----------------------------------------|------------------------------------------------|------------------------------------------------|------------------------------------------------|---------|
| Anti-S IgA (log <sub>10</sub> µg/mL):   |                                                |                                                |                                                |         |
| 7-21 days (14) after dose 1             | N=111<br>0.44 (0.26, 0.59)<br>1.21 (0, 1.21)   | N=10<br>0 (0, 0.28)<br>0.42 (0, 0.42)          | N=101<br>0.47 (0.31, 0.61)<br>1.21 (0, 1.21)   | 0.0002* |
| 1-2 months (1.5) after dose 1           | N=103<br>0.15 (0, 0.30)<br>0.68 (0, 0.68)      | N=11<br>0 (0, 0.28)<br>0.68 (0, 0.68)          | N=92<br>0.15 (0, 0.30)<br>0.63 (0, 0.63)       | 0.51    |
| 7-21 days (14) after dose 2             | N=114<br>0.68 (0.56, 0.79)<br>1.16 (0, 1.16)   | N=9<br>0.68 (0.50, 0.71)<br>0.79 (0, 0.79)     | N=105<br>0.68 (0.56, 0.79)<br>1.16 (0, 1.16)   | 0.33    |
| 1-2 months (1.5) after dose 2           | N=214<br>0.45 (0.31, 0.59)<br>1.09 (0, 1.09)   | N=31<br>0.39 (0.14, 0.53)<br>0.79 (0, 0.79)    | N=183<br>0.45 (0.31, 0.59)<br>1.09 (0, 1.09)   | 0.10    |
| 2.5-4.5 months (3) after dose 2         | N=395<br>0.43 (0.29, 0.56)<br>1.09 (0, 1.09)   | N=41<br>0.32 (0.15, 0.43)<br>0.82 (0, 0.82)    | N=354<br>0.44 (0.30, 0.56)<br>1.09 (0, 1.09)   | 0.0002* |
| 5.5-6.5 months (6) after dose 2         | N=160<br>0.37 (0.25, 0.48)<br>0.75 (0, 0.75)   | N=6<br>0.27 (0.19, 0.34)<br>0.42 (0, 0.42)     | N=154<br>0.38 (0.26, 0.49)<br>0.75 (0, 0.75)   | 0.09    |
| 1-2 months (1.5) after dose 3           | N=34<br>0.48 (0.37, 0.70)<br>1.18 (0.08, 1.26) | N=11<br>0.60 (0.37, 0.73)<br>0.73 (0.19, 0.92) | N=23<br>0.47 (0.37, 0.67)<br>1.18 (0.08, 1.26) | 0.38    |
| 2.5-4.5 months (3) after dose 3         | N=137<br>0.44 (0.31, 0.57)<br>1.45 (0, 1.45)   | N=18<br>0.42 (0.13, 0.51)<br>0.85 (0, 0.85)    | N=119<br>0.46 (0.31, 0.58)<br>1.45 (0, 1.45)   | 0.22    |
| 5.5-6.5 months (6) after dose 3         | N=42<br>0.47 (0.32, 0.61)<br>1.18 (0, 1.18)    | N=5<br>0.60 (0.08, 0.75)<br>1.06 (0, 1.06)     | N=37<br>0.47 (0.34, 0.60)<br>1.18 (0, 1.18)    | 0.82    |
| 2.5-4.5 months (3) after dose 4         | N=44<br>0.41 (0.28, 0.58)<br>1.45 (0, 1.45)    | N=13<br>0.37 (0.26, 0.64)<br>0.89 (0, 0.89)    | N=31<br>0.41 (0.30, 0.57)<br>1.45 (0, 1.45)    | 0.81    |
| 5.5-6.5 months (6) after dose 4         | N=19<br>0.33 (0, 0.44)<br>0.59 (0, 0.59)       | N=4<br>0.44 (0.21, 0.51)<br>0.56 (0, 0.56)     | N=15<br>0.29 (0, 0.41)<br>0.59 (0, 0.59)       | 0.31    |
| 1-2 months (1.5) after dose 5           | N=16<br>0.41 (0.21, 0.57)<br>0.60 (0, 0.60)    | N=4<br>0.41 (0.21, 0.58)<br>0.41 (0.17, 0.58)  | N=12<br>0.41 (0.15, 0.52)<br>0.60 (0, 0.60)    | 0.86    |
| 2.5-4.5 months (3) after dose 5         | N=27<br>0.18 (0, 0.43)<br>1.13 (0, 1.13)       | N=10<br>0.34 (0.18, 0.46)<br>0.84 (0, 0.84)    | N=17<br>0 (0, 0.29)<br>1.13 (0, 1.13)          | 0.057   |
| 5.5-6.5 months (6) after dose 5         | N=22<br>0 (0, 0.36)<br>0.76 (0, 0.76)          | N=4<br>0.11 (0, 0.39)<br>0.55 (0, 0.55)        | N=18<br>0 (0, 0.36)<br>0.76 (0, 0.76)          | 0.75    |
| 1-2 months (1.5) after dose 6           | N=9<br>0 (0, 0.36)<br>0.63 (0, 0.63)           | N=4<br>0.18 (0, 0.46)<br>0.57 (0, 0.57)        | N=5<br>0 (0, 0.23)<br>0.63 (0, 0.63)           | 0.89    |
| 2.5-4.5 months (3) after dose 6         | N=10<br>0.26 (0, 0.45)<br>0.58 (0, 0.58)       | N=4<br>0.16 (0.06, 0.29)<br>0.37 (0, 0.37)     | N=6<br>0.38 (0, 0.57)<br>0.58 (0, 0.58)        | 0.45    |
| 5.5-6.5 months (6) after dose 6         | N=8<br>0.28 (0.05, 0.58)<br>1.43 (0, 1.43)     | N=4<br>0.13 (0, 0.84)<br>1.43 (0, 1.43)        | N=4<br>0.37 (0.19, 0.58)<br>0.64 (0.09, 0.72)  | 0.47    |
| Anti-RBD IgA (log <sub>10</sub> µg/mL): |                                                |                                                |                                                |         |
| 7-21 days (14) after dose 1             | N=111                                          | N=10                                           | N=101                                          |         |

|                                       |                                                                         |                                                                  |                                                                        |        |
|---------------------------------------|-------------------------------------------------------------------------|------------------------------------------------------------------|------------------------------------------------------------------------|--------|
|                                       | 0.04 (0, 0.27)<br>0.69 (0, 0.69)<br>N=103<br>0 (0, 0)<br>0.46 (0, 0.46) | 0 (0, 0)<br>0.16 (0, 0.16)<br>N=11<br>0 (0, 0)<br>0.30 (0, 0.30) | 0.12 (0, 0.28)<br>0.69 (0, 0.69)<br>N=92<br>0 (0, 0)<br>0.46 (0, 0.46) | 0.007* |
| 1-2 months (1.5) after dose 1         |                                                                         |                                                                  |                                                                        | 0.70   |
| 7-21 days (14) after dose 2           | N=114<br>0.38 (0.24, 0.50)<br>0.91 (0, 0.91)                            | N=9<br>0.26 (0.06, 0.41)<br>0.50 (0, 0.50)                       | N=105<br>0.38 (0.24, 0.51)<br>0.91 (0, 0.91)                           | 0.12   |
| 1-2 months (1.5) after dose 2         | N=214<br>0.09 (0, 0.29)<br>0.81 (0, 0.81)                               | N=31<br>0 (0, 0.17)<br>0.68 (0, 0.68)                            | N=183<br>0.12 (0, 0.31)<br>0.81 (0, 0.81)                              | 0.01*  |
| 2.5-4.5 months (3) after dose 2       | N=395<br>0 (0, 0.23)<br>0.81 (0, 0.81)                                  | N=41<br>0 (0, 0)<br>0.58 (0, 0.58)                               | N=354<br>0 (0, 0.25)<br>0.81 (0, 0.81)                                 | 0.007* |
| 5.5-6.5 months (6) after dose 2       | N=161<br>0 (0, 0.13)<br>0.50 (0, 0.50)                                  | N=6<br>0 (0, 0)<br>0 (0, 0)                                      | N=154<br>0 (0, 0.13)<br>0.50 (0, 0.50)                                 | 0.11   |
| 1-2 months (1.5) after dose 3         | N=34<br>0.22 (0, 0.35)<br>0.83 (0, 0.83)                                | N=11<br>0.30 (0, 0.37)<br>0.55 (0, 0.55)                         | N=23<br>0.21 (0, 0.33)<br>0.83 (0, 0.83)                               | 0.97   |
| 2.5-4.5 months (3) after dose 3       | N=137<br>0.04 (0, 0.29)<br>0.94 (0, 0.94)                               | N=18<br>0.03 (0, 0.21)<br>0.53 (0, 0.53)                         | N=119<br>0.04 (0, 0.30)<br>0.94 (0, 0.94)                              | 0.59   |
| 5.5-6.5 months (6) after dose 3       | N=42<br>0 (0, 0.28)<br>0.75 (0, 0.75)                                   | N=5<br>0 (0, 0.26)<br>0.72 (0, 0.72)                             | N=37<br>0 (0, 0.28)<br>0.75 (0, 0.75)                                  | 0.93   |
| 2.5-4.5 months (3) after dose 4       | N=44<br>0.11 (0, 0.34)<br>0.93 (0, 0.93)                                | N=13<br>0.03 (0, 0.44)<br>0.57 (0, 0.57)                         | N=31<br>0.12 (0, 0.33)<br>0.93 (0, 0.93)                               | 1.00   |
| 5.5-6.5 months (6) after dose 4       | N=19<br>0 (0, 0.38)<br>0.60 (0, 0.60)                                   | N=4<br>0.05 (0, 0.17)<br>0.25 (0, 0.25)                          | N=15<br>0 (0, 0.40)<br>0.60 (0, 0.60)                                  | 0.63   |
| 1-2 months (1.5) after dose 5         | N=16<br>0.19 (0.01, 0.37)<br>0.71 (0, 0.71)                             | N=4<br>0.21 (0, 0.44)<br>0.46 (0, 0.46)                          | N=12<br>0.19 (0.03, 0.29)<br>0.71 (0, 0.71)                            | 0.86   |
| 2.5-4.5 months (3) after dose 5       | N=27<br>0.22 (0, 0.42)<br>1.00 (0, 1.00)                                | N=10<br>0 (0, 0.27)<br>1.00 (0, 1.00)                            | N=17<br>0.30 (0, 0.43)<br>0.86 (0, 0.86)                               | 0.11   |
| 5.5-6.5 months (6) after dose 5       | N=22<br>0.29 (0, 0.41)<br>1.16 (0, 1.16)                                | N=4<br>0.19 (0, 0.52)<br>0.66 (0, 0.66)                          | N=18<br>0.29 (0, 0.41)<br>1.16 (0, 1.16)                               | 1.00   |
| 1-2 months (1.5) after dose 6         | N=9<br>0.29 (0, 0.34)<br>1.00 (0, 1.00)                                 | N=4<br>0.28 (0.11, 0.67)<br>1.00 (0, 1.00)                       | N=5<br>0.29 (0, 0.29)<br>0.37 (0, 0.37)                                | 0.71   |
| 2.5-4.5 months (3) after dose 6       | N=10<br>0.29 (0, 0.59)<br>1.17 (0, 1.17)                                | N=4<br>0.29 (0.15, 0.73)<br>1.17 (0, 1.17)                       | N=6<br>0.16 (0, 0.59)<br>0.87 (0, 0.87)                                | 0.83   |
| 5.5-6.5 months (6) after dose 6       | N=8<br>0.12 (0, 0.21)<br>0.38 (0, 0.38)                                 | N=4<br>0.21 (0.14, 0.30)<br>0.28 (0.09, 0.38)                    | N=4<br>0 (0, 0.08)<br>0.15 (0, 0.15)                                   | 0.06   |
| Anti-S IgM (log <sub>10</sub> µg/mL): |                                                                         |                                                                  |                                                                        |        |
| 7-21 days (14) after dose 1           | N=111<br>0.26 (0.00, 0.47)<br>0.88 (0.00, 0.88)                         | N=10<br>0.10 (0, 0.35)<br>0.70 (0, 0.70)                         | N=101<br>0.27 (0.00, 0.47)<br>0.88 (0.00, 0.88)                        | 0.21   |
| 1-2 months (1.5) after dose 1         | N=103                                                                   | N=11                                                             | N=92                                                                   | 0.75   |

|                                         |                                                       |                                                 |                                                 |       |
|-----------------------------------------|-------------------------------------------------------|-------------------------------------------------|-------------------------------------------------|-------|
|                                         | 0.25 (0, 0.44)<br>0.88 (0, 0.88)                      | 0.15 (0, 0.45)<br>0.86 (0, 0.86)                | 0.25 (0, 0.42)<br>0.88 (0, 0.88)                |       |
| 7-21 days (14) after dose 2             | N=114<br>0.33 (0.21, 0.48)<br>1.44 (0, 1.44)          | N=9<br>0.22 (0, 0.34)<br>0.50 (0, 0.50)         | N=105<br>0.33 (0.22, 0.48)<br>1.44 (0, 1.44)    | 0.09  |
| 1-2 months (1.5) after dose 2           | N=214<br>0.21 (0.00, 0.38)<br>1.54 (0.00, 1.54)       | N=31<br>0.15 (0.00, 0.40)<br>1.54 (0.00, 1.54)  | N=183<br>0.22 (0.00, 0.39)<br>1.24 (0.00, 1.24) | 0.61  |
| 2.5-4.5 months (3) after dose 2         | N=395<br>0.18 (0.00, 0.37)<br>1.62 (0.00, 1.62)       | N=41<br>0.002 (0.00, 0.23)<br>1.38 (0.00, 1.38) | N=354<br>0.20 (0.00, 0.37)<br>1.62 (0.00, 1.62) | 0.05  |
| 5.5-6.5 months (6) after dose 2         | N=160<br>0.08 (0.00, 0.29)<br>1.10 (0.00, 1.10)       | N=6<br>0.22 (0.00, 0.84)<br>0.87 (0.00, 0.87)   | N=154<br>0.07 (0.00, 0.29)<br>1.10 (0.00, 1.10) | 0.23  |
| 1-2 months (1.5) after dose 3           | N=34<br>0.18 (0, 0.34)<br>1.54 (0, 1.54)              | N=11<br>0.18 (0, 0.32)<br>1.54 (0, 0.57)        | N=23<br>0.23 (0, 0.42)<br>0.91 (0, 0.91)        | 0.65  |
| 2.5-4.5 months (3) after dose 3         | N=137<br>0.21 (0.00, 0.12, 0.34)<br>1.84 (0.00, 1.84) | N=18<br>0.15 (0.00, 0.32)<br>1.15 (0.00, 1.15)  | N=119<br>0.21 (0.15, 0.34)<br>1.84 (0.00, 1.84) | 0.13  |
| 5.5-6.5 months (6) after dose 3         | N=42<br>0.24 (0.13, 0.39)<br>0.66 (0.01, 0.66)        | N=5<br>0.31 (0.23, 0.36)<br>0.55 (0.09, 0.64)   | N=37<br>0.22 (0.13, 0.39)<br>0.64 (0.01, 0.66)  | 0.49  |
| 2.5-4.5 months (3) after dose 4         | N=44<br>0.17 (0.09, 0.40)<br>2.19 (0, 2.19)           | N=13<br>0.30 (0.12, 0.51)<br>1.69 (0, 1.69)     | N=31<br>0.16 (0.09, 0.35)<br>2.16 (0.02, 2.19)  | 0.23  |
| 5.5-6.5 months (6) after dose 4         | N=19<br>0.07 (0.04, 0.36)<br>0.95 (0, 0.95)           | N=4<br>0.59 (0.25, 0.84)<br>0.89 (0.06, 0.95)   | N=15<br>0.06 (0.03, 0.18)<br>0.52 (0, 0.52)     | 0.04* |
| 1-2 months (1.5) after dose 5           | N=16<br>0.13 (0.04, 0.29)<br>1.69 (0, 1.69)           | N=4<br>0.27 (0.02, 1.10)<br>1.68 (0.01, 1.69)   | N=12<br>0.13 (0.07, 0.21)<br>0.40 (0, 0.40)     | 0.76  |
| 2.5-4.5 months (3) after dose 5         | N=27<br>0.06 (0.02, 0.25)<br>2.28 (0, 2.28)           | N=10<br>0.23 (0.02, 1.01)<br>2.28 (0, 2.28)     | N=17<br>0.06 (0.01, 0.16)<br>0.47 (0, 0.47)     | 0.21  |
| 5.5-6.5 months (6) after dose 5         | N=22<br>0.08 (0, 0.13)<br>2.47 (0, 2.47)              | N=4<br>0.20 (0.06, 1.37)<br>2.47 (0, 2.47)      | N=18<br>0.08 (0, 0.11)<br>1.34 (0, 1.34)        | 0.23  |
| 1-2 months (1.5) after dose 6           | N=9<br>0.14 (0.07, 0.38)<br>1.28 (0, 1.28)            | N=4<br>0.54 (0.24, 0.99)<br>1.17 (0.11, 1.28)   | N=5<br>0.07 (0.04, 0.14)<br>0.19 (0, 0.19)      | 0.07  |
| 2.5-4.5 months (3) after dose 6         | N=10<br>0.16 (0.04, 0.40)<br>1.05 (0.03, 1.08)        | N=4<br>0.26 (0.12, 0.47)<br>0.43 (0.11, 0.54)   | N=6<br>0.11 (0.04, 0.37)<br>1.05 (0.03, 1.08)   | 0.46  |
| 5.5-6.5 months (6) after dose 6         | N=8<br>0.17 (0.07, 0.24)<br>1.26 (0, 1.26)            | N=4<br>0.12 (0.03, 0.72)<br>1.26 (0, 1.26)      | N=4<br>0.20 (0.12, 0.24)<br>0.17 (0.08, 0.25)   | 0.67  |
| Anti-RBD IgM (log <sub>10</sub> µg/mL): |                                                       |                                                 |                                                 |       |
| 7-21 days (14) after dose 1             | N=111<br>0.17 (0.06, 0.26)<br>0.78 (0, 0.78)          | N=10<br>0.05 (0, 0.17)<br>0.32 (0, 0.32)        | N=101<br>0.17 (0.07, 0.26)<br>0.78 (0, 0.78)    | 0.09  |
| 1-2 months (1.5) after dose 1           | N=103<br>0.17 (0.08, 0.27)<br>0.59 (0, 0.59)          | N=11<br>0.09 (0.00, 0.22)<br>0.42 (0.00, 0.42)  | N=92<br>0.18 (0.09, 0.27)<br>0.59 (0, 0.59)     | 0.21  |
| 7-21 days (14) after dose 2             | N=114<br>0.16 (0.09, 0.30)                            | N=9<br>0.07 (0, 0.11)                           | N=105<br>0.17 (0.10, 0.30)                      | 0.03* |

|                                 |                                                                            |                                                                          |                                                                            |      |
|---------------------------------|----------------------------------------------------------------------------|--------------------------------------------------------------------------|----------------------------------------------------------------------------|------|
| 1-2 months (1.5) after dose 2   | 1.22 (0, 1.22)<br>N=214<br>0.11 (0.04, 0.23)<br>1.06 (0.00, 1.06)<br>N=395 | 1.22 (0, 1.22)<br>N=31<br>0.07 (0.00, 0.17)<br>1.06 (0.00, 1.06)<br>N=41 | 1.16 (0, 1.16)<br>N=183<br>0.11 (0.06, 0.23)<br>1.02 (0.00, 1.02)<br>N=354 | 0.15 |
| 2.5-4.5 months (3) after dose 2 | 0.12 (0.02, 0.22)<br>1.20 (0, 1.20)<br>N=160                               | 0.11 (0, 0.18)<br>1.09 (0, 1.09)<br>N=6                                  | 0.12 (0.03, 0.22)<br>1.20 (0, 1.20)<br>N=154                               | 0.44 |
| 5.5-6.5 months (6) after dose 2 | 0.06 (0.00, 0.15)<br>1.82 (0.00, 1.82)                                     | 0.05 (0.03, 0.26)<br>0.29 (0, 0.29)                                      | 0.06 (0.00, 0.15)<br>1.82 (0.00, 1.81)                                     | 0.79 |
| 1-2 months (1.5) after dose 3   | N=34<br>0.12 (0.004, 0.20)<br>0.81 (0, 0.81)<br>N=137                      | N=11<br>0.12 (0, 0.28)<br>0.81 (0, 0.81)<br>N=18                         | N=23<br>0.12 (0.004, 0.19)<br>0.71 (0, 0.71)<br>N=119                      | 0.67 |
| 2.5-4.5 months (3) after dose 3 | 0.08 (0.03, 0.17)<br>1.21 (0, 1.21)<br>N=42                                | 0.18 (0.004, 0.32)<br>0.52 (0, 0.52)<br>N=5                              | 0.08 (0.03, 0.15)<br>1.21 (0.00, 1.21)<br>N=37                             | 0.28 |
| 5.5-6.5 months (6) after dose 3 | 0.10 (0.02, 0.21)<br>1.95 (0, 1.95)                                        | 0.07 (0, 0.32)<br>0.50 (0, 0.50)                                         | 0.11 (0.03, 0.20)<br>1.95 (0, 1.95)                                        | 0.82 |
| 2.5-4.5 months (3) after dose 4 | N=44<br>0.08 (0.03, 0.17)<br>1.88 (0, 1.88)<br>N=19                        | N=13<br>0.15 (0.02, 0.18)<br>0.95 (0, 0.95)<br>N=4                       | N=31<br>0.07 (0.03, 0.13)<br>1.88 (0, 1.88)<br>N=15                        | 0.45 |
| 5.5-6.5 months (6) after dose 4 | 0.12 (0.06, 0.16)<br>0.95 (0.02, 0.97)                                     | 0.16 (0.10, 0.57)<br>0.88 (0.06, 0.95)                                   | 0.11 (0.06, 0.14)<br>0.95 (0.02, 0.97)                                     | 0.34 |
| 1-2 months (1.5) after dose 5   | N=16<br>0.07 (0.03, 0.22)<br>0.40 (0, 0.40)<br>N=27                        | N=4<br>0.03 (0.01, 0.06)<br>0.08 (0, 0.08)<br>N=10                       | N=12<br>0.09 (0.05, 0.24)<br>0.40 (0, 0.40)<br>N=17                        | 0.12 |
| 2.5-4.5 months (3) after dose 5 | 0.08 (0.002, 0.16)<br>1.55 (0, 1.55)<br>N=22                               | 0.06 (0.02, 0.27)<br>1.55 (0, 1.55)<br>N=4                               | 0.08 (0, 0.14)<br>0.57 (0, 0.57)<br>N=18                                   | 0.84 |
| 5.5-6.5 months (6) after dose 5 | 0.11 (0.02, 0.21)<br>2.13 (0, 2.13)                                        | 0.13 (0.05, 1.15)<br>2.13 (0, 2.13)                                      | 0.10 (0.02, 0.21)<br>1.57 (0, 1.57)                                        | 0.70 |
| 1-2 months (1.5) after dose 6   | N=9<br>0.11 (0.06, 0.25)<br>1.53 (0, 1.53)<br>N=10                         | N=4<br>0.38 (0.14, 1.05)<br>1.47 (0.07, 1.53)<br>N=4                     | N=5<br>0.06 (0.06, 0.11)<br>0.25 (0, 0.25)<br>N=6                          | 0.11 |
| 2.5-4.5 months (3) after dose 6 | 0.11 (0.06, 0.31)<br>1.51 (0, 1.51)<br>N=8                                 | 0.29 (0.15, 0.75)<br>1.18 (0.02, 1.20)<br>N=4                            | 0.09 (0.06, 0.12)<br>1.51 (0, 1.51)<br>N=4                                 | 0.46 |
| 5.5-6.5 months (6) after dose 6 | 0.10 (0.06, 0.20)<br>0.33 (0, 0.33)                                        | 0.14 (0.09, 0.24)<br>0.27 (0.06, 0.33)                                   | 0.07 (0.03, 0.16)<br>0.24 (0, 0.24)                                        | 0.47 |

†Samples obtained after the administration of a subsequent vaccine dose, a self-reported positive COVID-19 RAT or PCR test, or natural immunity identified by serum testing (SCO>1 for anti-N IgG titres and either anti-S or anti-RBD titres) were excluded.

A two-sided alpha level of 0.05 was used to determine statistical significance: \*P ≤ 0.05.

**Supplementary Table 3:** Median log-adjusted IgG (log<sub>10</sub> BAU/mL), IgA and IgM (log<sub>10</sub> µg/mL) titres against the SARS-CoV-2 spike (S) and receptor-binding domain (RBD) proteins at time points prior to and following COVID-19 vaccine doses for participants with a prior SARS-CoV-2 infection, according to immune status at baseline (n=932 participants).<sup>†</sup>

| Antibody Titre<br>Median (IQR)<br>Range (min, max) | All Participants<br>N=932                       | IC – High level<br>N=104                       | NIC and IC – Low level<br>N=827                 | P      |
|----------------------------------------------------|-------------------------------------------------|------------------------------------------------|-------------------------------------------------|--------|
| Anti-S IgG (log <sub>10</sub> BAU/mL)              |                                                 |                                                |                                                 |        |
| 7-21 days (14) after dose 1                        | N=70<br>4.22 (3.64, 4.45)<br>2.46 (1.99, 4.45)  | N=6<br>4.44 (4.22, 4.45)<br>2.43 (2.02, 4.45)  | N=64<br>4.15 (3.63, 4.45)<br>2.46 (1.99, 4.45)  | 0.40   |
| 1-2 months (1.5) after dose 1                      | N=120<br>3.83 (3.18, 4.24)<br>3.67 (1.08, 4.45) | N=10<br>3.46 (2.12, 4.13)<br>2.52 (1.92, 4.44) | N=110<br>3.84 (3.24, 4.31)<br>3.37 (1.08, 4.45) | 0.14   |
| 1-2 months (1.5) after dose 2                      | N=127<br>3.70 (2.07, 4.03)<br>2.73 (1.72, 4.45) | N=10<br>2.73 (2.03, 3.73)<br>2.48 (1.97, 4.45) | N=117<br>3.72 (2.09, 4.03)<br>2.73 (1.72, 4.45) | 0.32   |
| 2.5-4.5 months (3) after dose 2                    | N=236<br>3.65 (3.42, 3.92)<br>2.64 (1.81, 4.45) | N=23<br>3.71 (3.41, 3.98)<br>2.41 (2.04, 4.45) | N=213<br>3.65 (3.43, 3.92)<br>2.64 (1.81, 4.45) | 0.64   |
| 5.5-6.5 months (6) after dose 2                    | N=73<br>3.40 (3.21, 3.65)<br>2.41 (2.04, 4.45)  | N=4<br>3.23 (3.15, 3.44)<br>0.58 (3.08, 3.66)  | N=69<br>3.40 (3.21, 3.65)<br>2.41 (2.04, 4.45)  | 0.39   |
| 1-2 months (1.5) after dose 3                      | N=51<br>3.79 (3.61, 4.01)<br>2.55 (2.02, 4.57)  | N=6<br>3.77 (3.54, 4.30)<br>1.00 (3.45, 4.45)  | N=45<br>3.79 (3.64, 4.00)<br>2.55 (2.02, 4.57)  | 1.00   |
| 2.5-4.5 months (3) after dose 3                    | N=95<br>3.76 (3.57, 3.92)<br>1.63 (2.66, 4.29)  | N=12<br>3.75 (3.55, 3.88)<br>0.85 (3.33, 4.17) | N=83<br>3.76 (3.57, 3.93)<br>1.63 (2.66, 4.29)  | 0.73   |
| 1-2 months (1.5) after dose 4                      | N=29<br>3.87 (3.73, 3.99)<br>1.10 (3.36, 4.45)  | N=4<br>3.91 (3.66, 4.04)<br>0.70 (3.44, 4.14)  | N=25<br>3.84 (3.73, 3.99)<br>1.10 (3.36, 4.45)  | 0.87   |
| 2.5-4.5 months (3) after dose 4                    | N=73<br>3.69 (3.57, 3.88)<br>2.49 (2.08, 4.57)  | N=6<br>3.61 (3.50, 3.83)<br>2.49 (2.08, 4.57)  | N=67<br>3.71 (3.57, 3.89)<br>1.38 (3.20, 4.57)  | 0.48   |
| 5.5-6.5 months (6) after dose 4                    | N=66<br>3.55 (3.43, 3.79)<br>1.33 (2.82, 4.14)  | N=4<br>3.50 (3.36, 3.64)<br>0.47 (3.27, 3.74)  | N=62<br>3.56 (3.43, 3.81)<br>1.33 (2.82, 4.14)  | 0.44   |
| 1-2 months (1.5) after dose 5                      | N=22<br>3.88 (3.65, 4.02)<br>1.03 (3.43, 4.45)  | N=4<br>3.66 (3.50, 3.88)<br>0.59 (3.43, 4.02)  | N=18<br>3.94 (3.68, 4.12)<br>1.00 (3.45, 4.45)  | 0.19   |
| 2.5-4.5 months (3) after dose 5                    | N=49<br>3.74 (3.58, 3.86)<br>1.34 (3.12, 4.45)  | N=7<br>3.35 (3.28, 3.74)<br>0.70 (3.12, 3.82)  | N=42<br>3.78 (3.64, 3.89)<br>1.19 (3.27, 4.45)  | 0.005* |
| 5.5-6.5 months (6) after dose 5                    | N=37<br>3.57 (3.39, 3.64)<br>1.38 (3.08, 4.45)  | N=4<br>3.44 (3.25, 3.54)<br>0.55 (3.08, 3.62)  | N=33<br>3.57 (3.39, 3.66)<br>1.34 (3.11, 4.45)  | 0.25   |
| Anti-RBD IgG (log <sub>10</sub> BAU/mL)            |                                                 |                                                |                                                 |        |
| 7-21 days (14) after dose 1                        | N=70<br>3.92 (3.61, 4.16)                       | N=6<br>4.13 (4.08, 4.17)                       | N=64<br>3.92 (3.61, 4.16)                       | 0.32   |

|                                       |                                                                      |                                                                     |                                                                      |        |
|---------------------------------------|----------------------------------------------------------------------|---------------------------------------------------------------------|----------------------------------------------------------------------|--------|
| 1-2 months (1.5) after dose 1         | 2.91 (1.98, 4.89)<br>N=120<br>3.77 (2.64, 4.02)<br>3.90 (1.19, 5.09) | 2.15 (2.09, 4.25)<br>N=10<br>3.86 (3.29, 4.02)<br>2.75 (2.33, 5.09) | 2.91 (1.98, 4.89)<br>N=110<br>3.76 (2.61, 4.02)<br>3.90 (1.19, 5.09) | 0.88   |
| 1-2 months (1.5) after dose 2         | N=127<br>3.73 (2.67, 4.01)<br>2.84 (2.24, 5.09)                      | N=10<br>3.93 (3.21, 4.07)<br>2.13 (2.48, 4.61)                      | N=117<br>3.72 (2.67, 3.98)<br>2.84 (2.24, 5.09)                      | 0.48   |
| 2.5-4.5 months (3) after dose 2       | N=236<br>3.66 (3.41, 3.98)<br>2.66 (2.42, 5.09)                      | N=23<br>3.63 (3.30, 4.11)<br>2.49 (2.59, 5.09)                      | N=213<br>3.67 (3.45, 3.96)<br>2.66 (2.42, 5.09)                      | 0.86   |
| 5.5-6.5 months (6) after dose 2       | N=73<br>3.33 (3.14, 3.56)<br>2.01 (2.20, 4.21)                       | N=4<br>2.90 (2.54, 3.52)<br>1.34 (2.50, 3.83)                       | N=69<br>3.33 (3.14, 3.56)<br>2.01 (2.20, 4.21)                       | 0.34   |
| 1-2 months (1.5) after dose 3         | N=51<br>3.82 (3.61, 4.01)<br>2.34 (2.50, 4.84)                       | N=6<br>3.58 (3.33, 3.95)<br>2.00 (2.50, 4.49)                       | N=45<br>3.82 (3.63, 4.01)<br>1.67 (3.17, 4.84)                       | 0.25   |
| 2.5-4.5 months (3) after dose 3       | N=95<br>3.75 (3.57, 3.96)<br>2.22 (2.16, 4.38)                       | N=12<br>3.71 (3.47, 3.84)<br>1.38 (2.91, 4.29)                      | N=83<br>3.76 (3.57, 3.96)<br>2.22 (2.16, 4.38)                       | 0.46   |
| 1-2 months (1.5) after dose 4         | N=29<br>3.94 (3.80, 4.14)<br>1.03 (3.39, 4.42)                       | N=4<br>4.01 (3.69, 4.17)<br>0.91 (3.39, 4.31)                       | N=25<br>3.93 (3.80, 4.14)<br>0.98 (3.44, 4.42)                       | 0.87   |
| 2.5-4.5 months (3) after dose 4       | N=73<br>3.82 (3.63, 4.03)<br>2.96 (2.04, 5.00)                       | N=6<br>3.68 (3.26, 3.94)<br>2.96 (2.04, 5.00)                       | N=67<br>3.84 (3.64, 4.03)<br>1.84 (3.12, 4.96)                       | 0.29   |
| 5.5-6.5 months (6) after dose 4       | N=66<br>3.74 (3.53, 3.97)<br>1.79 (2.68, 4.47)                       | N=4<br>3.67 (3.31, 3.89)<br>0.97 (3.05, 4.01)                       | N=62<br>3.74 (3.53, 3.97)<br>1.79 (2.68, 4.47)                       | 0.56   |
| 1-2 months (1.5) after dose 5         | N=22<br>4.06 (3.76, 4.22)<br>1.04 (3.48, 4.52)                       | N=4<br>3.76 (3.60, 4.01)<br>0.75 (3.48, 4.22)                       | N=18<br>4.09 (3.79, 4.33)<br>1.02 (3.51, 4.52)                       | 0.16   |
| 2.5-4.5 months (3) after dose 5       | N=49<br>3.83 (3.70, 4.00)<br>1.75 (2.83, 4.58)                       | N=7<br>3.44 (3.25, 3.70)<br>1.13 (2.83, 3.96)                       | N=42<br>3.89 (3.75, 4.03)<br>1.36 (3.22, 4.58)                       | 0.002* |
| 5.5-6.5 months (6) after dose 5       | N=37<br>3.66 (3.45, 3.79)<br>1.34 (3.14, 4.47)                       | N=4<br>3.42 (3.35, 3.60)<br>0.45 (3.31, 3.76)                       | N=33<br>3.66 (3.51, 3.79)<br>1.34 (3.14, 4.47)                       | 0.18   |
| Anti-S IgA (log <sub>10</sub> µg/mL): |                                                                      |                                                                     |                                                                      |        |
| 7-21 days (14) after dose 1           | N=77<br>0.80 (0.54, 1.00)<br>1.32 (0.00, 1.32)                       | N=6<br>0.36 (0.00, 0.80)<br>1.22 (0.00, 1.22)                       | N=71<br>0.80 (0.56, 1.00)<br>1.32 (0.00, 1.32)                       | 0.11   |
| 1-2 months (1.5) after dose 1         | N=122<br>0.64 (0.38, 0.79)<br>1.39 (0.00, 1.39)                      | N=10<br>0.61 (0.00, 0.74)<br>0.80 (0.00, 0.80)                      | N=112<br>0.64 (0.40, 0.80)<br>1.39 (0.00, 1.39)                      | 0.24   |
| 1-2 months (1.5) after dose 2         | N=130<br>0.66 (0.51, 0.83)<br>1.42 (0.00, 1.42)                      | N=11<br>(0.33, 0.76)<br>0.97 (0.00, 0.97)                           | N=119<br>0.66 (0.52, 0.83)<br>1.42 (0.00, 1.42)                      | 0.07   |
| 2.5-4.5 months (3) after dose 2       | N=236<br>0.65 (0.47, 0.79)<br>1.45 (0.00, 1.45)                      | N=23<br>0.70 (0.33, 0.80)<br>1.27 (0.00, 1.27)                      | N=213<br>0.64 (0.49, 0.79)<br>1.45 (0.00, 1.45)                      | 0.37   |
| 5.5-6.5 months (6) after dose 2       | N=73                                                                 | N=4                                                                 | N=69                                                                 | 0.16   |

|                                         |                                                 |                                                |                                                 |      |
|-----------------------------------------|-------------------------------------------------|------------------------------------------------|-------------------------------------------------|------|
|                                         | 0.58 (0.38, 0.77)<br>1.31 (0.00, 1.31)          | 0.14 (0.00, 0.72)<br>1.16 (0.00, 1.16)         | 0.59 (0.38, 0.77)<br>1.31 (0.00, 1.31)          |      |
| 1-2 months (1.5) after dose 3           | N=52<br>0.51 (0.40, 0.73)<br>1.45 (0.00, 1.45)  | N=7<br>0.50 (0.29, 0.73)<br>0.91 (0.00, 0.91)  | N=45<br>0.55 (0.40, 0.73)<br>1.45 (0.00, 1.45)  | 0.38 |
| 2.5-4.5 months (3) after dose 3         | N=94<br>0.58 (0.41, 0.80)<br>1.45 (0.00, 1.45)  | N=13<br>0.49 (0.40, 0.71)<br>1.08 (0.00, 1.08) | N=81<br>0.59 (0.41, 0.81)<br>1.18 (0.28, 1.45)  | 0.48 |
| 2.5-4.5 months (3) after dose 4         | N=72<br>0.51 (0.42, 0.70)<br>1.45 (0.00, 1.45)  | N=5<br>0.50 (0.00, 0.63)<br>0.71 (0.00, 0.71)  | N=67<br>0.51 (0.42, 0.70)<br>1.45 (0.00, 1.45)  | 0.41 |
| 5.5-6.5 months (6) after dose 4         | N=65<br>0.45 (0.31, 0.60)<br>1.06 (0.00, 1.06)  | N=4<br>0.58 (0.54, 0.69)<br>0.27 (0.51, 0.78)  | N=61<br>0.45 (0.31, 0.59)<br>1.06 (0.00, 1.06)  | 0.09 |
| 1-2 months (1.5) after dose 5           | N=23<br>0.61 (0.48, 0.88)<br>0.89 (0.25, 1.14)  | N=4<br>0.60 (0.29, 0.87)<br>0.63 (0.25, 0.88)  | N=19<br>0.61 (0.48, 0.94)<br>0.82 (0.32, 1.14)  | 0.49 |
| 2.5-4.5 months (3) after dose 5         | N=48<br>0.50 (0.29, 0.73)<br>1.18 (0.00, 1.18)  | N=6<br>0.20 (0.07, 0.86)<br>0.88 (0.00, 0.88)  | N=42<br>0.51 (0.35, 0.72)<br>1.18 (0.00, 1.18)  | 0.23 |
| 5.5-6.5 months (6) after dose 5         | N=37<br>0.44 (0.24, 0.55)<br>0.93 (0.00, 0.93)  | N=4<br>0.32 (0.13, 0.71)<br>0.83 (0.10, 0.93)  | N=33<br>0.44 (0.24, 0.55)<br>0.88 (0.00, 0.88)  | 0.86 |
| Anti-RBD IgA (log <sub>10</sub> µg/mL): |                                                 |                                                |                                                 |      |
| 7-21 days (14) after dose 1             | N=77<br>0.60 (0.35, 0.72)<br>1.34 (0.00, 1.34)  | N=6<br>0.45 (0.00, 0.72)<br>0.95 (0.00, 0.95)  | N=71<br>0.60 (0.39, 0.75)<br>1.34 (0.00, 1.34)  | 0.39 |
| 1-2 months (1.5) after dose 1           | N=122<br>0.41 (0.17, 0.56)<br>1.08 (0.00, 1.08) | N=10<br>0.47 (0.12, 0.51)<br>0.87 (0.00, 0.87) | N=112<br>0.41 (0.17, 0.57)<br>1.08 (0.00, 1.08) | 0.92 |
| 1-2 months (1.5) after dose 2           | N=130<br>0.46 (0.30, 0.61)<br>1.16 (0.00, 1.16) | N=11<br>0.13 (0.00, 0.50)<br>0.74 (0.00, 0.74) | N=119<br>0.46 (0.31, 0.62)<br>1.16 (0.00, 1.16) | 0.06 |
| 2.5-4.5 months (3) after dose 2         | N=236<br>0.39 (0.19, 0.54)<br>1.33 (0.00, 1.33) | N=23<br>0.42 (0.00, 0.58)<br>1.12 (0.00, 1.12) | N=213<br>0.39 (0.21, 0.54)<br>1.33 (0.00, 1.33) | 0.40 |
| 5.5-6.5 months (6) after dose 2         | N=73<br>0.27 (0.00, 0.51)<br>1.08 (0.00, 1.08)  | N=4<br>0.00 (0.00, 0.47)<br>0.94 (0.00, 0.94)  | N=69<br>0.27 (0.00, 0.51)<br>1.08 (0.00, 1.08)  | 0.30 |
| 1-2 months (1.5) after dose 3           | N=52<br>0.36 (0.15, 0.50)<br>0.87 (0.00, 0.87)  | N=7<br>0.34 (0.00, 0.63)<br>0.73 (0.00, 0.73)  | N=45<br>0.37 (0.19, 0.49)<br>0.87 (0.00, 0.87)  | 0.56 |
| 2.5-4.5 months (3) after dose 3         | N=94<br>0.36 (0.15, 0.56)<br>1.25 (0.00, 1.25)  | N=13<br>0.34 (0.32, 0.68)<br>1.25 (0.00, 1.25) | N=81<br>0.36 (0.15, 0.56)<br>1.14 (0.00, 1.14)  | 0.78 |
| 2.5-4.5 months (3) after dose 4         | N=72<br>0.44 (0.25, 0.59)<br>1.41 (0.00, 1.41)  | N=5<br>0.17 (0.00, 0.51)<br>0.59 (0.00, 0.59)  | N=67<br>0.44 (0.27, 0.59)<br>1.41 (0.00, 1.41)  | 0.20 |
| 5.5-6.5 months (6) after dose 4         | N=65<br>0.58 (0.44, 0.70)<br>1.31 (0.00, 1.31)  | N=4<br>0.48 (0.39, 0.63)<br>0.37 (0.35, 0.72)  | N=61<br>0.58 (0.45, 0.70)<br>1.31 (0.00, 1.31)  | 0.42 |

|                                         |                                                 |                                                |                                                 |       |
|-----------------------------------------|-------------------------------------------------|------------------------------------------------|-------------------------------------------------|-------|
| 1-2 months (1.5) after dose 5           | N=23<br>0.58 (0.45, 0.74)<br>0.71 (0.23, 0.94)  | N=4<br>0.54 (0.45, 0.64)<br>0.21 (0.44, 0.65)  | N=19<br>0.58 (0.46, 0.74)<br>0.71 (0.23, 0.94)  | 0.66  |
| 2.5-4.5 months (3) after dose 5         | N=48<br>0.56 (0.42, 0.66)<br>1.10 (0.00, 1.10)  | N=6<br>0.47 (0.39, 0.64)<br>0.64 (0.00, 0.64)  | N=42<br>0.56 (0.43, 0.68)<br>1.10 (0.00, 1.10)  | 0.32  |
| 5.5-6.5 months (6) after dose 5         | N=37<br>0.55 (0.44, 0.66)<br>1.32 (0.22, 1.54)  | N=4<br>0.51 (0.38, 0.72)<br>0.43 (0.37, 0.80)  | N=33<br>0.55 (0.44, 0.66)<br>1.32 (0.22, 1.54)  | 0.71  |
| Anti-S IgM (log <sub>10</sub> µg/mL):   |                                                 |                                                |                                                 |       |
| 7-21 days (14) after dose 1             | N=77<br>0.39 (0.25, 0.53)<br>1.52 (0.00, 1.52)  | N=6<br>0.44 (0.43, 0.53)<br>0.42 (0.21, 0.63)  | N=71<br>0.36 (0.24, 0.55)<br>1.52 (0.00, 1.52)  | 0.46  |
| 1-2 months (1.5) after dose 1           | N=122<br>0.32 (0.19, 0.48)<br>1.54 (0.00, 1.54) | N=10<br>0.20 (0.00, 0.36)<br>1.27 (0.00, 1.27) | N=112<br>0.33 (0.21, 0.49)<br>1.54 (0.00, 1.54) | 0.16  |
| 1-2 months (1.5) after dose 2           | N=130<br>0.34 (0.20, 0.49)<br>1.62 (0.00, 1.62) | N=11<br>0.47 (0.00, 0.63)<br>1.21 (0.00, 1.21) | N=119<br>0.34 (0.20, 0.48)<br>1.62 (0.00, 1.62) | 0.86  |
| 2.5-4.5 months (3) after dose 2         | N=236<br>0.28 (0.16, 0.43)<br>1.57 (0.00, 1.57) | N=23<br>0.23 (0.00, 0.41)<br>1.36 (0.00, 1.36) | N=213<br>0.28 (0.16, 0.43)<br>1.57 (0.00, 1.57) | 0.50  |
| 5.5-6.5 months (6) after dose 2         | N=73<br>0.23 (0.00, 0.37)<br>1.80 (0.00, 1.80)  | N=4<br>0.26 (0.21, 0.32)<br>0.14 (0.21, 0.34)  | N=69<br>0.23 (0.00, 0.37)<br>1.80 (0.00, 1.80)  | 0.72  |
| 1-2 months (1.5) after dose 3           | N=52<br>0.25 (0.05, 0.39)<br>0.91 (0.00, 0.91)  | N=7<br>0.03 (0.00, 0.32)<br>0.60 (0.00, 0.60)  | N=45<br>0.27 (0.11, 0.40)<br>0.91 (0.00, 0.91)  | 0.29  |
| 2.5-4.5 months (3) after dose 3         | N=94<br>0.24 (0.11, 0.41)<br>1.38 (0.00, 1.38)  | N=13<br>0.36 (0.00, 0.40)<br>1.33 (0.00, 1.33) | N=81<br>0.23 (0.12, 0.41)<br>1.38 (0.00, 1.38)  | 0.99  |
| 1-2 months (1.5) after dose 4           | N=27<br>0.26 (0.10, 0.41)<br>0.73 (0.00, 0.73)  | N=3<br>0.09 (0.00, 0.09)<br>0.09 (0.00, 0.09)  | N=24<br>0.26 (0.17, 0.42)<br>0.66 (0.07, 0.73)  | 0.02* |
| 2.5-4.5 months (3) after dose 4         | N=72<br>0.23 (0.10, 0.41)<br>2.49 (0.00, 2.49)  | N=5<br>0.03 (0.00, 0.10)<br>1.45 (0.00, 1.45)  | N=67<br>0.23 (0.13, 0.42)<br>2.49 (0.00, 2.49)  | 0.06  |
| 5.5-6.5 months (6) after dose 4         | N=65<br>0.14 (0.07, 0.26)<br>1.07 (0.00, 1.07)  | N=4<br>0.03 (0.01, 0.10)<br>0.17 (0.00, 0.17)  | N=61<br>0.15 (0.08, 0.27)<br>1.07 (0.00, 1.07)  | 0.04* |
| 1-2 months (1.5) after dose 5           | N=23<br>0.30 (0.15, 0.53)<br>1.10 (0.00, 1.10)  | N=4<br>0.29 (0.12, 0.61)<br>0.88 (0.00, 0.88)  | N=19<br>0.30 (0.15, 0.53)<br>1.10 (0.00, 1.10)  | 0.94  |
| 2.5-4.5 months (3) after dose 5         | N=48<br>0.16 (0.08, 0.42)<br>1.15 (0.00, 1.15)  | N=6<br>0.12 (0.00, 0.45)<br>0.45 (0.00, 0.45)  | N=42<br>0.16 (0.09, 0.39)<br>1.15 (0.00, 1.15)  | 0.43  |
| 5.5-6.5 months (6) after dose 5         | N=37<br>0.06 (0.009, 0.26)<br>1.45 (0.00, 1.45) | N=4<br>0.04 (0.02, 0.05)<br>0.06 (0.00, 0.06)  | N=33<br>0.06 (0.009, 0.26)<br>1.45 (0.00, 1.45) | 0.26  |
| Anti-RBD IgM (log <sub>10</sub> µg/mL): |                                                 |                                                |                                                 |       |
| 7-21 days (14) after dose 1             | N=77                                            | N=6                                            | N=71                                            | 0.93  |

|                                 |                                                                                           |                                                                                          |                                                                                           |      |
|---------------------------------|-------------------------------------------------------------------------------------------|------------------------------------------------------------------------------------------|-------------------------------------------------------------------------------------------|------|
| 1-2 months (1.5) after dose 1   | 0.27 (0.19, 0.41)<br>1.21 (0.00, 1.21)<br>N=122<br>0.20 (0.10, 0.31)<br>1.76 (0.00, 1.76) | 0.28 (0.17, 0.42)<br>0.39 (0.10, 0.49)<br>N=10<br>0.16 (0.09, 0.24)<br>0.82 (0.00, 0.82) | 0.27 (0.19, 0.41)<br>1.21 (0.00, 1.21)<br>N=112<br>0.20 (0.11, 0.32)<br>1.76 (0.00, 1.76) | 0.39 |
| 1-2 months (1.5) after dose 2   | N=130<br>0.19 (0.09, 0.33)<br>1.33 (0.00, 1.33)                                           | N=11<br>0.26 (0.00, 0.43)<br>1.33 (0.00, 1.33)                                           | N=119<br>0.19 (0.10, 0.32)<br>1.01 (0.00, 1.01)                                           | 0.98 |
| 2.5-4.5 months (3) after dose 2 | N=236<br>0.17 (0.08, 0.28)<br>1.72 (0.00, 1.72)                                           | N=23<br>0.11 (0.06, 0.24)<br>1.31 (0.00, 1.31)                                           | N=213<br>0.17 (0.08, 0.29)<br>1.72 (0.00, 1.72)                                           | 0.23 |
| 5.5-6.5 months (6) after dose 2 | N=73<br>0.15 (0.06, 0.25)<br>1.32 (0.00, 1.32)                                            | N=4<br>0.16 (0.13, 0.18)<br>0.07 (0.11, 0.18)                                            | N=69<br>0.13 (0.02, 0.26)<br>1.32 (0.00, 1.32)                                            | 0.89 |
| 1-2 months (1.5) after dose 3   | N=52<br>0.11 (0.006, 0.23)<br>0.66 (0.00, 0.66)                                           | N=7<br>0.10 (0.00, 0.22)<br>0.54 (0.00, 0.54)                                            | N=45<br>0.12 (0.02, 0.24)<br>0.66 (0.00, 0.66)                                            | 0.61 |
| 2.5-4.5 months (3) after dose 3 | N=94<br>0.10 (0.03, 0.21)<br>1.81 (0.00, 1.81)                                            | N=13<br>0.15 (0.06, 0.21)<br>0.54 (0.00, 0.55)                                           | N=81<br>0.09 (0.03, 0.20)<br>1.81 (0.00, 1.81)                                            | 0.54 |
| 2.5-4.5 months (3) after dose 4 | N=72<br>0.15 (0.06, 0.30)<br>2.11 (0.00, 2.11)                                            | N=5<br>0.17 (0.09, 0.18)<br>0.65 (0.00, 0.65)                                            | N=67<br>0.15 (0.06, 0.30)<br>2.11 (0.00, 2.11)                                            | 0.99 |
| 5.5-6.5 months (6) after dose 4 | N=65<br>0.19 (0.11, 0.34)<br>0.83 (0.006, 0.84)                                           | N=4<br>0.06 (0.04, 0.15)<br>0.22 (0.02, 0.24)                                            | N=61<br>0.19 (0.11, 0.34)<br>0.83 (0.006, 0.84)                                           | 0.06 |
| 1-2 months (1.5) after dose 5   | N=23<br>0.18 (0.10, 0.43)<br>1.85 (0.00, 1.85)                                            | N=4<br>0.23 (0.07, 1.09)<br>1.85 (0.00, 1.85)                                            | N=19<br>0.18 (0.10, 0.43)<br>0.96 (0.003, 0.97)                                           | 0.97 |
| 2.5-4.5 months (3) after dose 5 | N=48<br>0.19 (0.07, 0.35)<br>1.84 (0.00, 1.84)                                            | N=6<br>0.19 (0.00, 0.25)<br>0.36 (0.00, 0.36)                                            | N=42<br>0.19 (0.08, 0.35)<br>1.84 (0.00, 1.84)                                            | 0.37 |
| 5.5-6.5 months (6) after dose 5 | N=37<br>0.13 (0.06, 0.24)<br>1.76 (0.00, 1.76)                                            | N=4<br>0.06 (0.01, 0.13)<br>0.16 (0.00, 0.16)                                            | N=33<br>0.14 (0.07, 0.31)<br>1.76 (0.00, 1.76)                                            | 0.13 |

†Samples obtained after the administration of a subsequent vaccine dose were excluded.

A two-sided alpha level of 0.05 was used to determine statistical significance: \* $P \leq 0.05$ .

**Supplementary Table 4:** Multivariable linear regression of anti-receptor-binding domain (RBD) IgG, IgA, and IgM antibodies after five SARS-CoV-2 vaccine doses. For models that include separate smooths for IC groups, the difference of predicted titres between high-severity immune compromised participants (IC) and low-level IC & non-immune compromised (NIC) participants are shown below model estimates (see column “IC – NIC”). High-level IC referent: low-level & NIC. Male sex referent: female sex. Non-White race referent: White race. Time=Days since dose date. Dose 1-4 vaccine type referent: Pfizer-BioNTech. Note, for dose 5 the vaccine type referent is Pfizer-BioNTech (bivalent) for anti-RBD IgG ( $\log_{10}$  BAU/mL) and Moderna (bivalent) for anti-RBD IgA ( $\log_{10}$   $\mu\text{g/mL}$ ) and IgM ( $\log_{10}$   $\mu\text{g/mL}$ ).

A. Participants with no prior SARS-CoV-2 infection

| Anti-RBD IgG ( $\log_{10}$ BAU/mL) |          |         | Anti-RBD IgA ( $\log_{10}$ $\mu\text{g/mL}$ ) |          |         | Anti-RBD IgM ( $\log_{10}$ $\mu\text{g/mL}$ ) |          |         |
|------------------------------------|----------|---------|-----------------------------------------------|----------|---------|-----------------------------------------------|----------|---------|
| <b>Dose 1</b>                      |          |         |                                               |          |         |                                               |          |         |
|                                    | Estimate | P       |                                               | Estimate | P       |                                               | Estimate | P       |
| Intercept                          | 2.66     | <0.0001 |                                               | 0.13     | <0.0001 |                                               | 0.25     | <0.0001 |
| High-level IC                      | -0.31    | 0.002   |                                               | -0.05    | 0.05    |                                               | -0.04    | 0.15    |
| Age at dose 1                      | -0.01    | <0.0001 |                                               | -0.001   | 0.04    |                                               | -0.002   | 0.01    |
| Male sex                           | 0.02     | 0.75    |                                               | 0.03     | 0.09    |                                               | 0.04     | 0.04    |
| Non-White Ethnicity                | -0.18    | 0.12    |                                               | -0.01    | 0.72    |                                               | -0.06    | 0.12    |
| Dose Type Moderna                  | 0.55     | 0.0001  |                                               | 0.11     | 0.003   |                                               | 0.04     | 0.38    |
| Dose Type AZ                       | -0.13    | 0.17    |                                               | -0.008   | 0.74    |                                               | -0.008   | 0.78    |
| Time                               | IC - NIC | P       | Time                                          | IC - NIC | P       | Time                                          | IC - NIC | P       |
| 15                                 | -0.71    | <0.001  | 0                                             | 0.05     | 0.42    | 0                                             | 0.01     | 0.86    |
| 25                                 | -0.54    | 0.006   | 15                                            | -0.17    | <0.001  | 15                                            | -0.05    | 0.24    |
| 50                                 | -0.22    | 0.24    | 40                                            | -0.02    | 0.75    | 30                                            | -0.03    | 0.66    |
| 70                                 | -0.59    | 0.24    | 70                                            | -0.04    | 0.65    | 60                                            | -0.11    | 0.05    |
| <b>Dose 2</b>                      |          |         |                                               |          |         |                                               |          |         |
|                                    | Estimate | P       |                                               | Estimate | P       |                                               | Estimate | P       |
| Intercept                          | 3.34     | <0.0001 |                                               | 0.24     | <0.0001 |                                               | 0.19     | <0.0001 |
| High-level IC                      | -0.46    | <0.0001 |                                               | -0.05    | 0.01    |                                               | -0.03    | 0.09    |
| Age at dose 2                      | -0.01    | <0.0001 |                                               | -0.002   | 0.003   |                                               | -0.001   | 0.005   |
| Male sex                           | 0.04     | 0.35    |                                               | 0.05     | 0.0007  |                                               | -0.0003  | 0.97    |
| Non-White Ethnicity                | -0.03    | 0.62    |                                               | 0.04     | 0.07    |                                               | -0.004   | 0.80    |
| Dose Type Moderna                  | 0.22     | <0.0001 |                                               | 0.06     | 0.0001  |                                               | 0.02     | 0.06    |
| Days between dose 1 & 2            | 0.004    | <0.0001 |                                               | -0.001   | <0.0001 |                                               | -0.001   | 0.001   |
| Time                               | IC - NIC | P       | Time                                          | IC - NIC | P       | Time                                          | IC - NIC | P       |
| Not applicable                     |          |         | -20                                           | -0.02    | 0.55    | -25                                           | -0.10    | <0.001  |
|                                    |          |         | 0                                             | -0.04    | 0.13    | 0                                             | -0.07    | <0.001  |
|                                    |          |         | 15                                            | -0.33    | <0.001  | 15                                            | -0.06    | <0.001  |
|                                    |          |         | 50                                            | -0.06    | 0.007   | 50                                            | -0.04    | 0.02    |
|                                    |          |         | 100                                           | -0.02    | 0.43    | 75                                            | -0.05    | 0.004   |
|                                    |          |         | 150                                           | 0.006    | 0.84    | 100                                           | -0.03    | 0.05    |
|                                    |          |         | 250                                           | 0.05     | 0.27    | 150                                           | 0.04     | 0.06    |
|                                    |          |         |                                               |          |         | 225                                           | 0.03     | 0.32    |
| <b>Dose 3</b>                      |          |         |                                               |          |         |                                               |          |         |
|                                    | Estimate | P       |                                               | Estimate | P       |                                               | Estimate | P       |
| Intercept                          | 3.84     | <0.0001 |                                               | 0.10     | 0.14    |                                               | 0.10     | 0.20    |
| High-level IC                      | -0.20    | 0.07    |                                               | 0.05     | 0.12    |                                               | 0.01     | 0.87    |

|                                                                                                                                                                                      |          |       |                |          |          |      |          |      |
|--------------------------------------------------------------------------------------------------------------------------------------------------------------------------------------|----------|-------|----------------|----------|----------|------|----------|------|
| Age at dose 3                                                                                                                                                                        | -0.01    | 0.001 | -0.001         | 0.50     | 0.0004   | 0.67 |          |      |
| Male sex                                                                                                                                                                             | 0.05     | 0.55  | 0.03           | 0.24     | -0.02    | 0.42 |          |      |
| Non-White Ethnicity                                                                                                                                                                  | -0.14    | 0.31  | 0.08           | 0.06     | 0.001    | 0.98 |          |      |
| Dose Type Moderna                                                                                                                                                                    | 0.29     | 0.001 | 0.08           | 0.005    | 0.07     | 0.03 |          |      |
| Days between dose 2 & 3                                                                                                                                                              | -0.001   | 0.07  | 0.0001         | 0.56     | -0.00001 | 0.95 |          |      |
| Time                                                                                                                                                                                 | IC - NIC | P     | Time           | IC - NIC | P        | Time | IC - NIC | P    |
| Not applicable                                                                                                                                                                       |          |       | Not applicable |          |          | -25  | 0.04     | 0.59 |
| Note: when separate smooths were generated for IC groups, high-level IC predicted titres were lower than low-level IC & NIC predicted titres at 25, 50, 150 days after vaccine dose. |          |       |                |          |          | 0    | 0.03     | 0.49 |
|                                                                                                                                                                                      |          |       |                |          |          | 15   | 0.03     | 0.50 |
|                                                                                                                                                                                      |          |       |                |          |          | 75   | 0.02     | 0.80 |
|                                                                                                                                                                                      |          |       |                |          |          | 150  | -0.02    | 0.78 |
|                                                                                                                                                                                      |          |       |                |          |          | 200  | -0.05    | 0.70 |
|                                                                                                                                                                                      |          |       |                |          |          | 240  | -0.07    | 0.70 |

| Dose 4                                                                                                                                                                                                               |          |         |          |          |          |      |          |      |
|----------------------------------------------------------------------------------------------------------------------------------------------------------------------------------------------------------------------|----------|---------|----------|----------|----------|------|----------|------|
|                                                                                                                                                                                                                      | Estimate | P       | Estimate | P        | Estimate | P    |          |      |
| Intercept                                                                                                                                                                                                            | 3.54     | <0.0001 | -0.12    | 0.56     | 0.17     | 0.05 |          |      |
| High-level IC                                                                                                                                                                                                        | -0.22    | 0.11    | -0.06    | 0.36     | 0.01     | 0.66 |          |      |
| Age at dose 4                                                                                                                                                                                                        | -0.001   | 0.78    | 0.002    | 0.42     | -0.001   | 0.30 |          |      |
| Male sex                                                                                                                                                                                                             | -0.03    | 0.82    | 0.004    | 0.94     | -0.03    | 0.08 |          |      |
| Dose Type Moderna                                                                                                                                                                                                    | 0.02     | 0.83    | 0.05     | 0.29     | -0.005   | 0.82 |          |      |
| Dose Type Moderna (Bivalent)                                                                                                                                                                                         | 0.21     | 0.28    | -0.06    | 0.50     | 0.07     | 0.07 |          |      |
| Dose Type Pfizer-BioNTech (Bivalent)                                                                                                                                                                                 | -0.33    | 0.30    | -0.30    | 0.05     | -0.04    | 0.52 |          |      |
| Days between dose 3 & 4                                                                                                                                                                                              | -0.0001  | 0.91    | 0.001    | 0.06     | -0.00004 | 0.86 |          |      |
| Time                                                                                                                                                                                                                 | IC - NIC | P       | Time     | IC - NIC | P        | Time | IC - NIC | P    |
| Not applicable                                                                                                                                                                                                       |          |         | -35      | -0.15    | 0.11     | -25  | -0.04    | 0.28 |
| Note: when separate smooths were generated for IC groups, high-level IC predicted titres were lower than low-level IC & NIC predicted titres at 20 days prior to vaccine dose and 0, 25, 50 days after vaccine dose. |          |         | 0        | -0.08    | 0.28     | 0    | -0.03    | 0.38 |
|                                                                                                                                                                                                                      |          |         | 25       | -0.05    | 0.54     | 25   | -0.02    | 0.56 |
|                                                                                                                                                                                                                      |          |         | 50       | -0.02    | 0.86     | 50   | -0.005   | 0.84 |
|                                                                                                                                                                                                                      |          |         | 100      | 0.02     | 0.84     | 100  | 0.02     | 0.62 |
|                                                                                                                                                                                                                      |          |         | 150      | -0.02    | 0.84     | 200  | 0.05     | 0.26 |
|                                                                                                                                                                                                                      |          |         | 250      | -0.15    | 0.28     | 250  | 0.07     | 0.22 |
| 300                                                                                                                                                                                                                  | -0.10    | 0.53    | 300      | 0.09     | 0.20     |      |          |      |

#### B. Participants with at least one prior SARS-CoV-2 infection

| Anti-RBD IgG (log <sub>10</sub> BAU/mL) |          |         | Anti-RBD IgA (log <sub>10</sub> µg/mL) |        | Anti-RBD IgM (log <sub>10</sub> µg/mL) |         |
|-----------------------------------------|----------|---------|----------------------------------------|--------|----------------------------------------|---------|
| Dose 1                                  |          |         |                                        |        |                                        |         |
|                                         | Estimate | P       | Estimate                               | P      | Estimate                               | P       |
| Intercept                               | 2.37     | <0.0001 | 0.23                                   | 0.0004 | 0.27                                   | <0.0001 |
| High-level IC                           | 0.006    | 0.97    | -0.03                                  | 0.66   | -0.06                                  | 0.36    |
| Age at dose 1                           | 0.01     | <0.0001 | 0.002                                  | 0.08   | 0.001                                  | 0.19    |
| Male sex                                | -0.10    | 0.32    | 0.02                                   | 0.57   | -0.03                                  | 0.43    |
| Non-White Ethnicity                     | 0.29     | 0.06    | -0.01                                  | 0.85   | 0.08                                   | 0.12    |
| Dose Type Moderna                       | 0.02     | 0.87    | -0.05                                  | 0.32   | 0.04                                   | 0.38    |
| Dose Type AZ                            | -0.59    | 0.0001  | -0.19                                  | 0.0005 | 0.009                                  | 0.86    |
| Days since last COVID-19 infection      | -0.001   | 0.17    | -0.0002                                | 0.08   | 0.0003                                 | 0.008   |

| Time | IC - NIC | P    | Time                                                                                                                                                                                        | IC - NIC | P     | Time | IC - NIC | P    |
|------|----------|------|---------------------------------------------------------------------------------------------------------------------------------------------------------------------------------------------|----------|-------|------|----------|------|
| 0    | 0.42     | 0.14 | Not applicable. Note: when separate smooths were generated for IC groups, high-level IC predicted titres were lower than low-level IC & NIC predicted titres at 10 days after vaccine dose. |          |       | 0    | -0.02    | 0.77 |
| 15   | -0.18    | 0.54 |                                                                                                                                                                                             | 15       | -0.04 | 0.64 |          |      |
| 40   | -0.05    | 0.89 |                                                                                                                                                                                             | 40       | -0.08 | 0.33 |          |      |
| 60   | 0.54     | 0.13 |                                                                                                                                                                                             | 60       | -0.02 | 0.83 |          |      |

**Dose 2**

|                                    | Estimate | P       | Estimate | P       | Estimate | P       |
|------------------------------------|----------|---------|----------|---------|----------|---------|
| Intercept                          | 3.33     | <0.0001 | 0.33     | <0.0001 | 0.29     | <0.0001 |
| High-level IC                      | 0.05     | 0.61    | -0.02    | 0.74    | -0.003   | 0.95    |
| Age at dose 2                      | 0.007    | 0.0004  | -0.001   | 0.69    | -0.0001  | 0.96    |
| Male sex                           | 0.07     | 0.24    | 0.05     | 0.15    | -0.02    | 0.50    |
| Non-White Ethnicity                | 0.06     | 0.49    | 0.03     | 0.55    | 0.02     | 0.61    |
| Dose Type Moderna                  | 0.06     | 0.35    | 0.02     | 0.69    | -0.02    | 0.54    |
| Dose Type AZ                       | -        | -       | 0.02     | 0.90    | -        | -       |
| Days between dose 1 & 2            | -0.003   | 0.005   | -0.0003  | 0.63    | -0.001   | 0.27    |
| Days since last COVID-19 infection | -0.001   | 0.003   | -0.0003  | 0.004   | 0.0001   | 0.31    |

| Time           | IC - NIC | P | Time           | IC - NIC | P | Time | IC - NIC | P    |
|----------------|----------|---|----------------|----------|---|------|----------|------|
| Not applicable |          |   | Not applicable |          |   | -15  | -0.06    | 0.37 |
|                |          |   |                |          |   | 0    | -0.01    | 0.86 |
|                |          |   |                |          |   | 15   | 0.03     | 0.59 |
|                |          |   |                |          |   | 40   | 0.07     | 0.24 |
|                |          |   |                |          |   | 75   | 0.03     | 0.60 |
|                |          |   |                |          |   | 100  | -0.04    | 0.58 |
|                |          |   |                |          |   | 150  | -0.06    | 0.47 |
|                |          |   |                |          |   | 175  | -0.005   | 0.97 |

**Dose 3**

|                                    | Estimate | P       | Estimate | P    | Estimate | P       |
|------------------------------------|----------|---------|----------|------|----------|---------|
| Intercept                          | 3.28     | <0.0001 | 0.26     | 0.03 | 0.25     | <0.0001 |
| High-level IC                      | -0.05    | 0.56    | -0.03    | 0.62 | -0.002   | 0.93    |
| Age at dose 3                      | 0.006    | 0.006   | 0.0002   | 0.89 | -0.002   | 0.009   |
| Male sex                           | 0.04     | 0.51    | 0.05     | 0.17 | -0.01    | 0.50    |
| Non-White Ethnicity                | -0.10    | 0.32    | 0.07     | 0.26 | 0.00003  | 0.999   |
| Dose Type Moderna                  | 0.16     | 0.004   | 0.05     | 0.17 | 0.02     | 0.20    |
| Days between dose 2 & 3            | 0.001    | 0.03    | 0.0005   | 0.23 | -0.0002  | 0.29    |
| Days since last COVID-19 infection | 0.001    | <0.0001 | 0.0001   | 0.07 | -0.00003 | 0.32    |

| Time           | IC - NIC | P | Time           | IC - NIC | P | Time | IC - NIC | P    |
|----------------|----------|---|----------------|----------|---|------|----------|------|
| Not applicable |          |   | Not applicable |          |   | 0    | -0.02    | 0.68 |
|                |          |   |                |          |   | 15   | -0.01    | 0.78 |
|                |          |   |                |          |   | 50   | -0.003   | 0.95 |
|                |          |   |                |          |   | 100  | -0.002   | 0.97 |
|                |          |   |                |          |   | 200  | -0.01    | 0.80 |
|                |          |   |                |          |   | 300  | -0.0001  | 1.00 |
|                |          |   |                |          |   | 400  | 0.06     | 0.27 |
|                |          |   |                |          |   | 485  | 0.13     | 0.13 |

**Dose 4**

|                                      | Estimate | P       | Estimate       | P        | Estimate | P              |          |   |  |
|--------------------------------------|----------|---------|----------------|----------|----------|----------------|----------|---|--|
| Intercept                            | 3.70     | <0.0001 | 0.48           | 0.01     | 0.17     | 0.08           |          |   |  |
| High-level IC                        | -0.19    | 0.03    | -0.11          | 0.02     | -0.07    | 0.11           |          |   |  |
| Age at dose 4                        | 0.002    | 0.51    | -0.001         | 0.46     | 0.0003   | 0.80           |          |   |  |
| Non-White Ethnicity                  | 0.006    | 0.91    | 0.03           | 0.50     | -0.01    | 0.60           |          |   |  |
| Male sex                             | -0.13    | 0.31    | -0.09          | 0.41     | 0.11     | 0.06           |          |   |  |
| Dose Type Moderna                    | 0.11     | 0.11    | -0.02          | 0.74     | 0.05     | 0.11           |          |   |  |
| Dose Type Moderna (Half dose)        | 0.07     | 0.68    | -0.34          | 0.03     | -0.03    | 0.72           |          |   |  |
| Dose Type Moderna (Bivalent)         | 0.09     | 0.37    | 0.02           | 0.79     | 0.09     | 0.06           |          |   |  |
| Dose Type Pfizer-BioNTech (Bivalent) | 0.05     | 0.64    | -0.02          | 0.87     | 0.13     | 0.02           |          |   |  |
| Days between dose 3 & 4              | 0.0001   | 0.83    | 0.0004         | 0.50     | -0.0003  | 0.37           |          |   |  |
| Days since last COVID-19 infection   | 0.0005   | <0.0001 | 0.00002        | 0.84     | 0.0001   | 0.17           |          |   |  |
| Time                                 | IC - NIC | P       | Time           | IC - NIC | P        | Time           | IC - NIC | P |  |
| -30                                  | -0.28    | 0.01    | -30            | -0.12    | 0.14     | Not applicable |          |   |  |
| 0                                    | -0.21    | 0.03    | 0              | -0.10    | 0.23     |                |          |   |  |
| 25                                   | -0.16    | 0.11    | 25             | -0.08    | 0.29     |                |          |   |  |
| 50                                   | -0.12    | 0.22    | 50             | -0.08    | 0.33     |                |          |   |  |
| 150                                  | -0.14    | 0.21    | 100            | -0.09    | 0.28     |                |          |   |  |
| 200                                  | -0.20    | 0.06    | 150            | -0.11    | 0.16     |                |          |   |  |
| 250                                  | -0.25    | 0.03    | 200            | -0.13    | 0.12     |                |          |   |  |
| 300                                  | -0.28    | 0.04    | 250            | -0.13    | 0.12     |                |          |   |  |
| 350                                  | -0.27    | 0.05    |                |          |          |                |          |   |  |
| 400                                  | -0.24    | 0.11    |                |          |          |                |          |   |  |
| 450                                  | -0.21    | 0.27    |                |          |          |                |          |   |  |
| <b>Dose 5</b>                        |          |         |                |          |          |                |          |   |  |
|                                      | Estimate | P       | Estimate       | P        | Estimate | P              |          |   |  |
| Intercept                            | 3.77     | <0.0001 | 0.53           | 0.003    | 0.01     | 0.93           |          |   |  |
| High-level IC                        | -0.44    | 0.0007  | -0.16          | 0.09     | -0.10    | 0.21           |          |   |  |
| Age at dose 5                        | 0.000    | 0.97    | 0.00004        | 0.99     | 0.003    | 0.21           |          |   |  |
| Male sex                             | 0.02     | 0.86    | -0.02          | 0.79     | -0.10    | 0.10           |          |   |  |
| Dose Type Moderna (Bivalent)         | 0.14     | 0.15    | Referent       | -        | Referent | -              |          |   |  |
| Dose Type Pfizer (Bivalent)          | Referent | -       | 0.04           | 0.58     | 0.10     | 0.08           |          |   |  |
| Days between dose 4 & 5              | 0.0004   | 0.54    | 0.0003         | 0.54     | 0.0002   | 0.70           |          |   |  |
| Days since last SARS-CoV-2 infection | 0.0002   | 0.20    | 0.0001         | 0.35     | 0.0002   | 0.09           |          |   |  |
| Time                                 | IC - NIC | P       | Time           | IC - NIC | P        | Time           | IC - NIC | P |  |
| Not applicable                       |          |         | Not applicable |          |          | Not applicable |          |   |  |

An alpha level of 0.025 was used to determine statistical significance to account for bias from multiplicity.
